# Supplementary material for: Well-balanced performance achieved in PZT piezoceramics via a multiscale regulation strategy
Source: Royal Society of Chemistry journal article supplement (doi:10.1039/d4mh00703d), 2024-01-01
Supplement: d4mh00703d1.pdf [file d4mh00703d1.pdf]

## Supplementary materials

### Well-Balanced Performance Achieved in PZT Piezoceramics via a Multiscale Regulation Strategy

Wei Xiao<sup>a,b</sup>, Zhengran Chen<sup>a,\*</sup>, Xiaowei Liu<sup>c,d</sup>, Zhiyong Zhou<sup>a,b</sup>, Zhengqian Fu<sup>c</sup>, Yizheng Tang<sup>e</sup>, Ruihong Liang<sup>a,b,\*</sup>

- <sup>a</sup> Key Laboratory of Inorganic Functional Materials and Devices, Shanghai Institute of Ceramics, Chinese Academy of Sciences, 588 Heshuo Road, Jiading District, Shanghai 201800, China
- <sup>b</sup> Center of Materials Science and Optoelectronics Engineering, University of Chinese Academy of Sciences, 19 Yuquan Road, Shijinshan District, Beijing 100049, China
- <sup>c</sup> State Key Laboratory of High Performance Ceramics and Superfine Microstructures, Shanghai Institute of Ceramics, Chinese Academy of Sciences, Shanghai 200050, China
- <sup>d</sup> School of Physical Science and Technology, Shanghai Tech University, Shanghai 201210, China
- <sup>e</sup> Hangzhou Applied Acoustics Research Institute, Hangzhou 310023, China

**Table S1**The various electromechanical properties for  $\text{Pb}_{1-x}\text{Ba}_x\text{SNZT-Mn}$  ceramics.

| $x$ (mol%) | $d_{33}$ (pC/N) | $Q_m$ | $k_p$ | $\tan\delta$ | $\epsilon$ | $T_c$ (°C) |
|------------|-----------------|-------|-------|--------------|------------|------------|
| 0.00       | 423             | 582   | 0.64  | 0.0028       | 1733       | 350        |
| 0.04       | 449             | 658   | 0.67  | 0.0023       | 1928       | 320        |
| 0.08       | 474             | 679   | 0.68  | 0.0021       | 2126       | 291        |
| 0.12       | 502             | 726   | 0.69  | 0.0024       | 2405       | 267        |
| 0.16       | 507             | 546   | 0.67  | 0.0026       | 2691       | 235        |

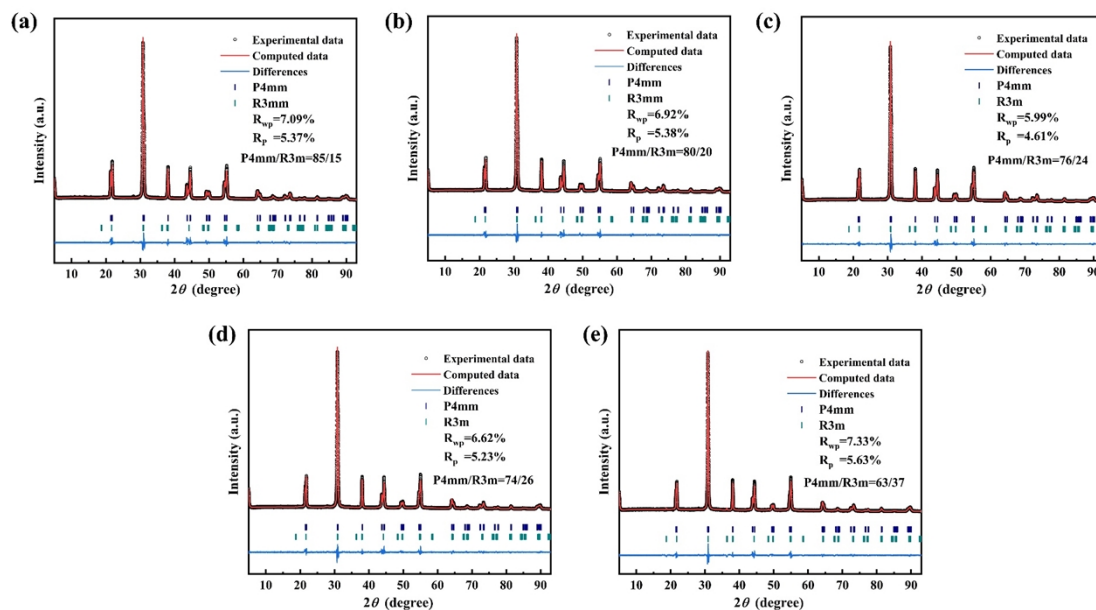Figure S1. Rietveld refinement of the  $\text{Pb}_{1-x}\text{Ba}_x\text{SNZT-Mn}$  ceramics: (a)  $x = 0.00$ , (b)  $x = 0.04$ , (c)  $x = 0.08$ , (d)  $x = 0.12$ , and (e)  $x = 0.16$ .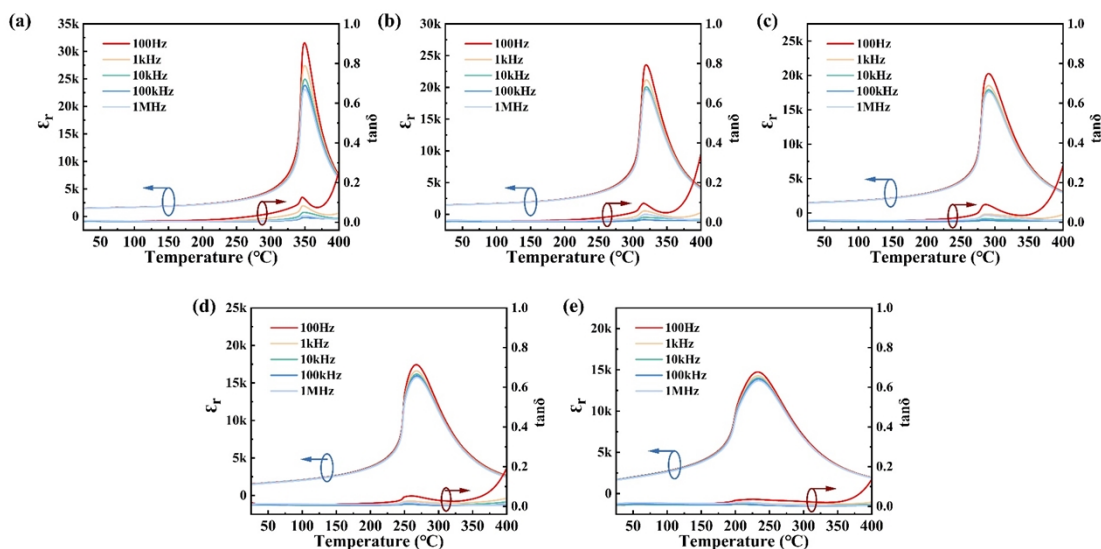Figure S2. Temperature-dependent permittivity and dielectric loss of  $\text{Pb}_{1-x}\text{Ba}_x\text{SNZT-Mn}$  ceramics: (a)  $x = 0.00$ , (b)  $x = 0.04$ , (c)  $x = 0.08$ , (d)  $x = 0.12$ , and (e)  $x = 0.16$ .

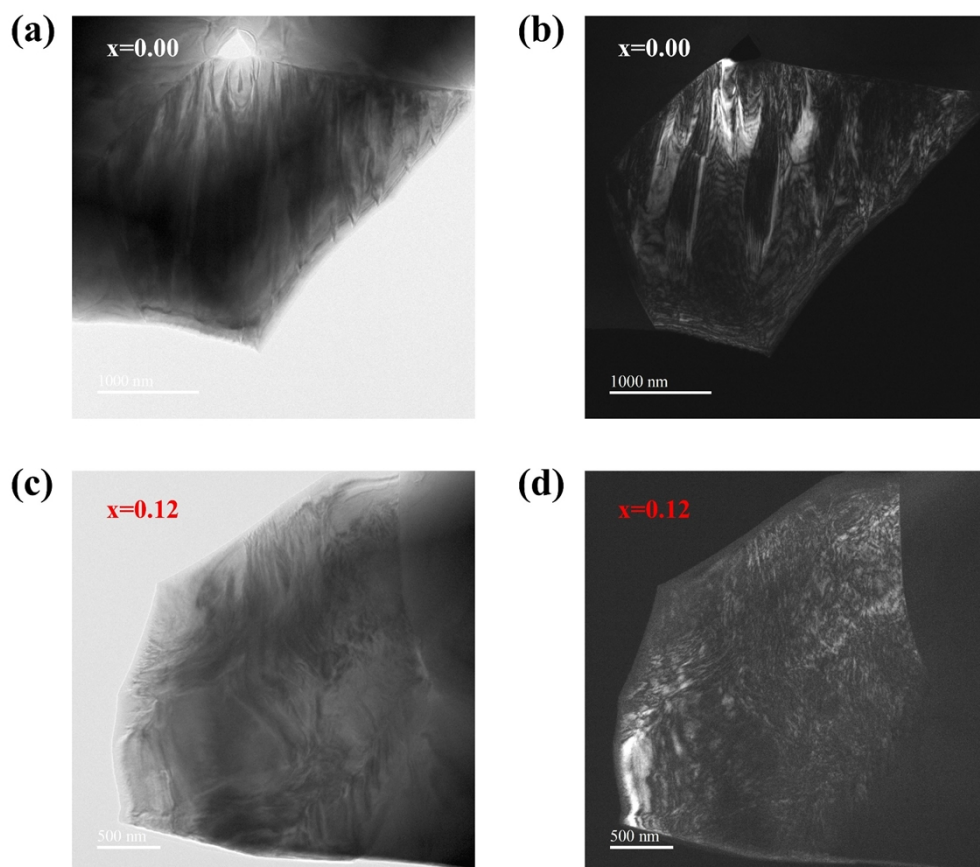

Figure S3. (a,c) Bright-field and (b,d) Dark-field TEM images showing the ferroelectric domains of the  $x = 0.00$  and  $x = 0.12$  ceramic samples, respectively.

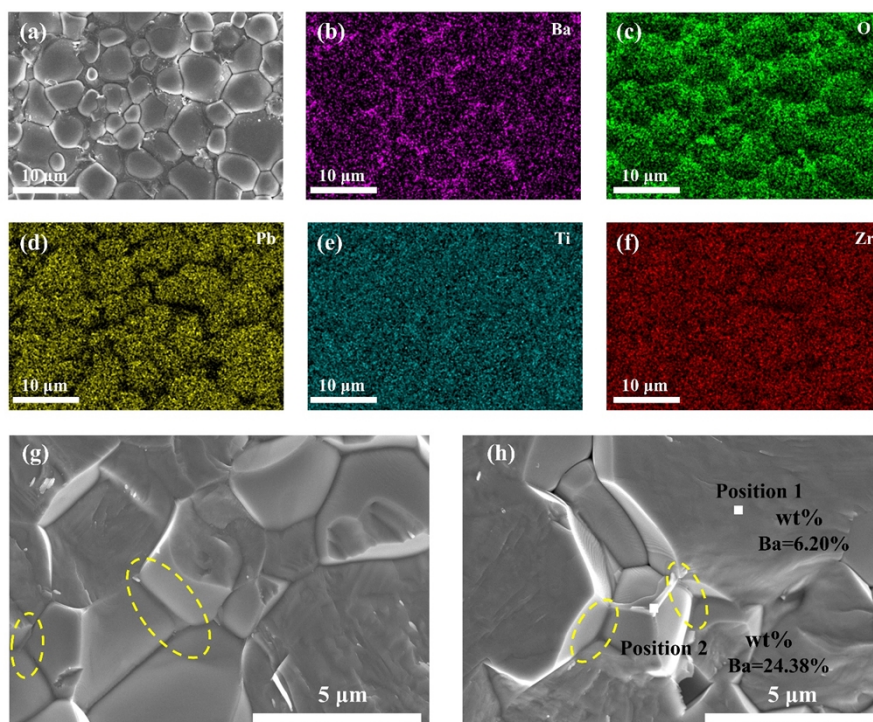

Figure S4. Microscopic morphology of  $x = 0.12$  ceramic samples: (a) surface morphology, (b-f) element distributions, (g-h) cross-sectional morphology.

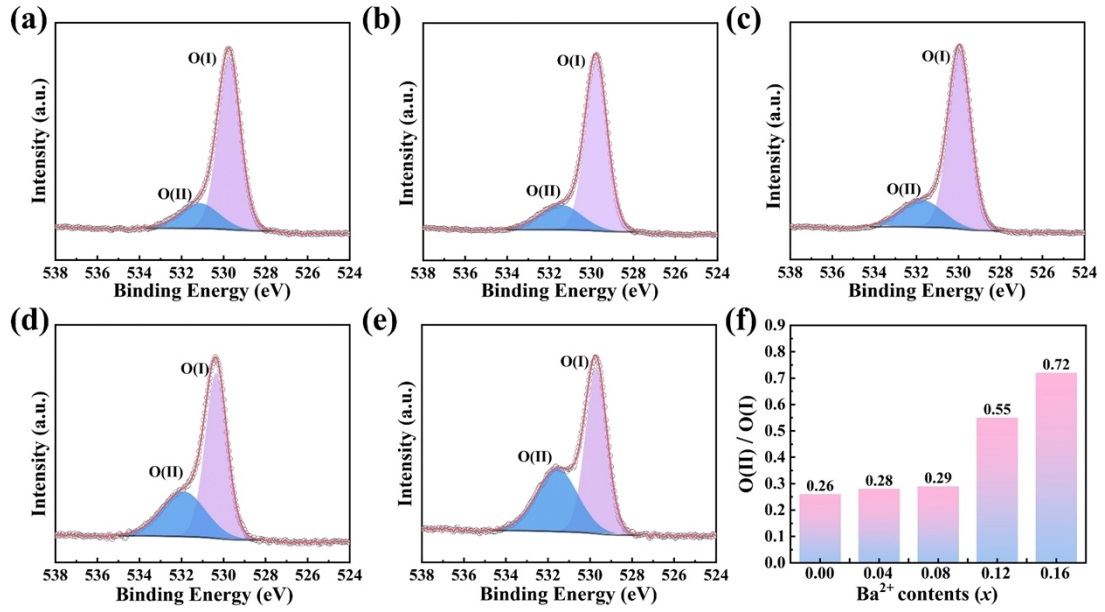

Figure S5. XPS spectrum of O 1s peak of  $\text{Pb}_{1-x}\text{Ba}_x\text{SNZT-Mn}$  ceramics: (a)  $x = 0.00$ , (b)  $x = 0.04$ , (c)  $x = 0.08$ , (d)  $x = 0.12$ , and (e)  $x = 0.16$ . (f) The area ratios of the two sub-peaks in XPS O 1s spectra.
